# Supplementary material for: The role of skeletal muscle Akt in the regulation of muscle mass and glucose homeostasis
Source: PubMed Central journal article supplement — Mol Metab. 2019 Aug 5;28:1–13. doi: 10.1016/j.molmet.2019.08.001 (PMC6822261; doi:10.1016/j.molmet.2019.08.001), 2019-08-05

Supplementary Figure 1: Normal activation of the insulin receptor and liver and heart Akt signaling in M-AktDKO mice.

**A**

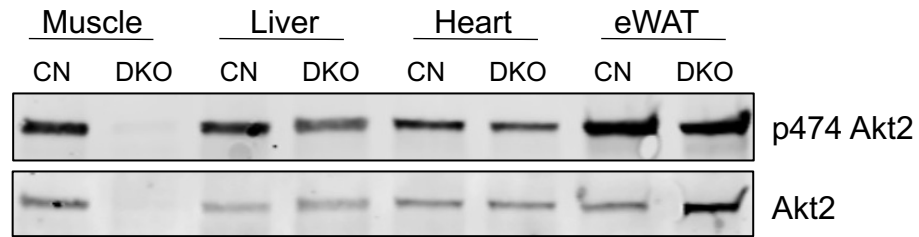

**B**

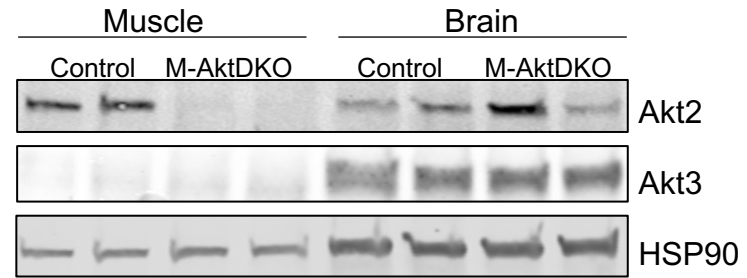

**C**

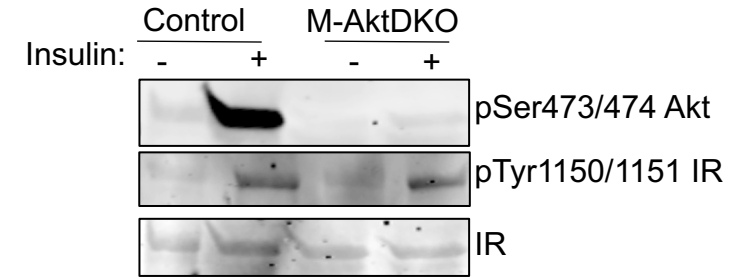

Supplemental Figure 2: Deletion of Akt results in a decrease myofibril size and alters muscle morphology

A

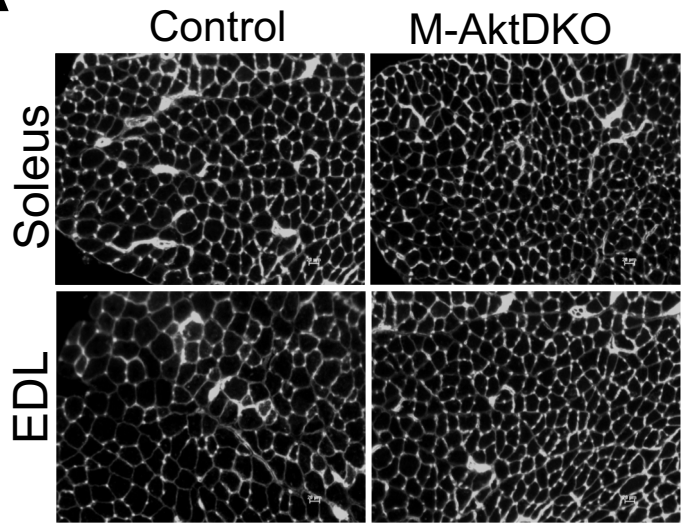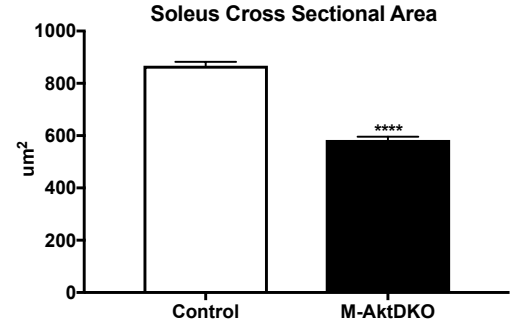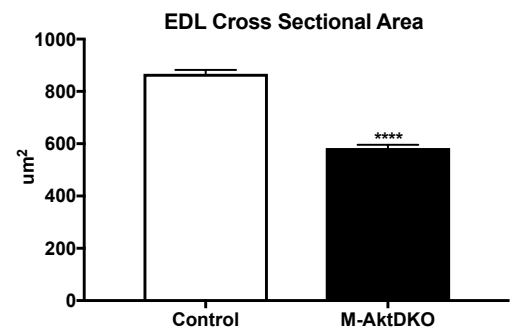

Supplementary Figure 3: Female M-AktDKO mice display a significant reduction in muscle mass

**A**

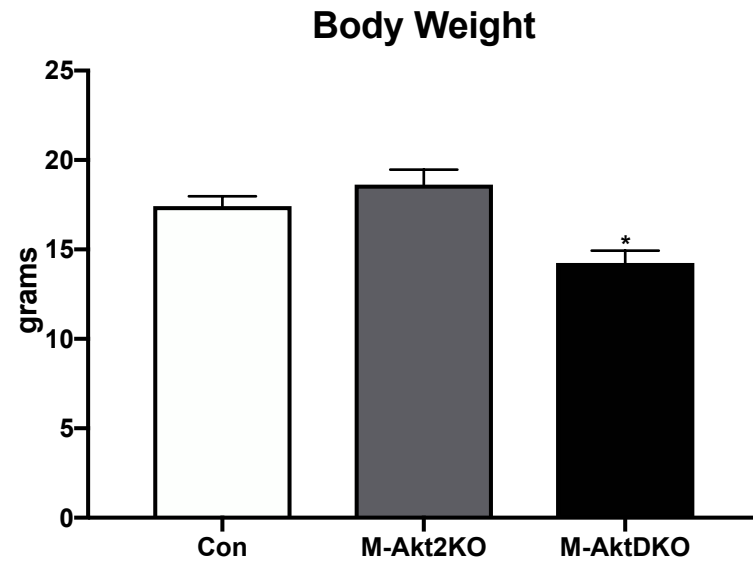

**B**

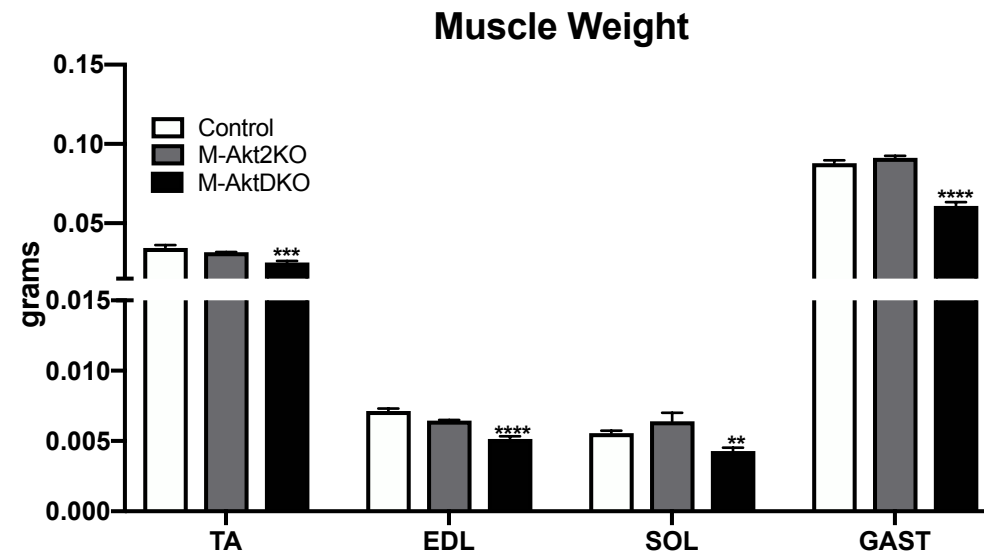

Supplementary Figure 4: Female M-AktDKO mice exhibit mild alteration in glucose homeostasis

**A**

**Glucose Tolerance Test**

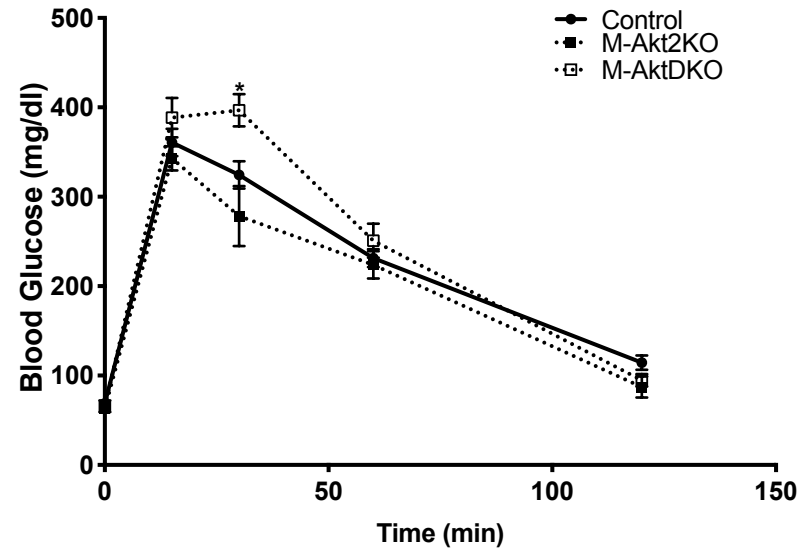

**B**

**Insulin Tolerance Test**

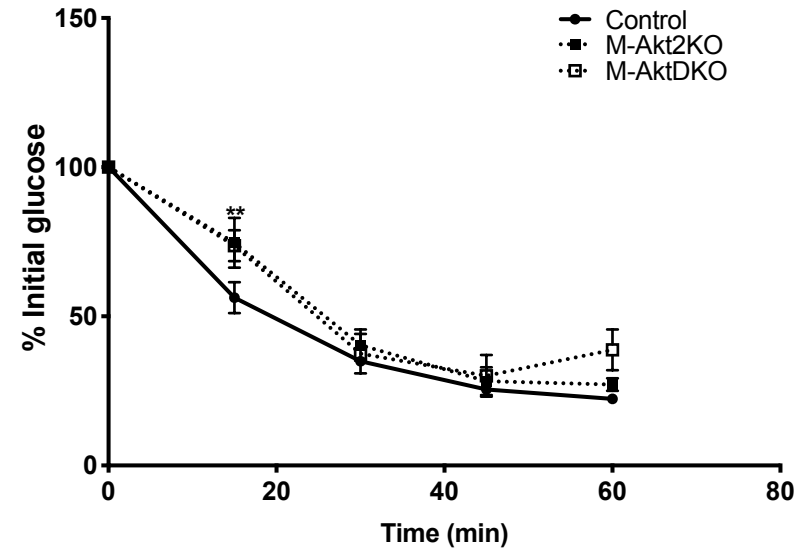

Supplementary Figure 5. Glut-4 protein expression in EDL and soleus muscle in M-AktDKO mice and quantitation of western blots from Figure 4

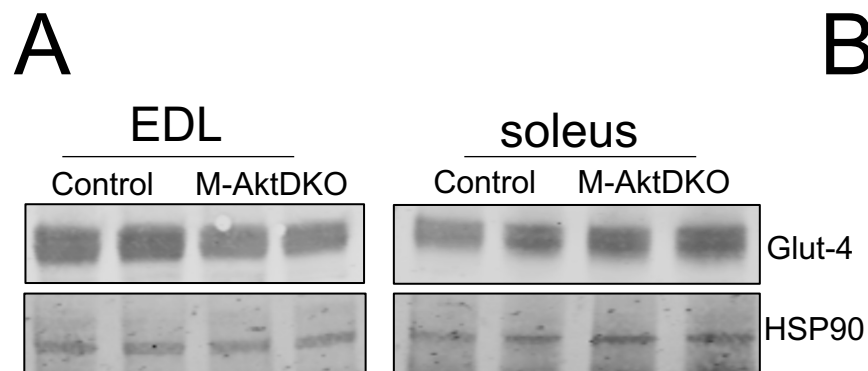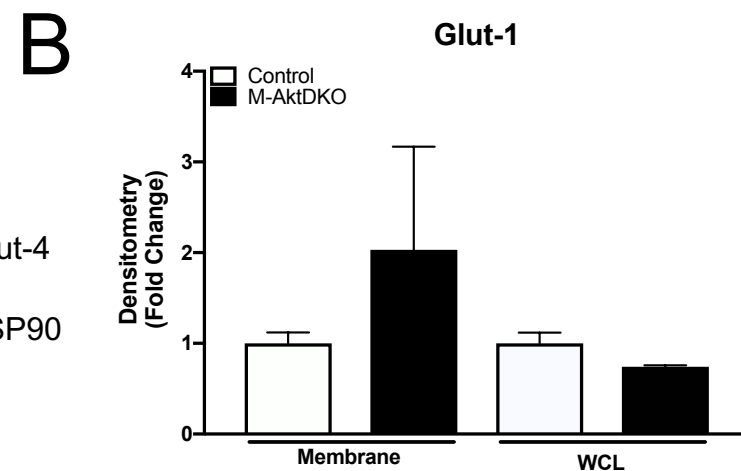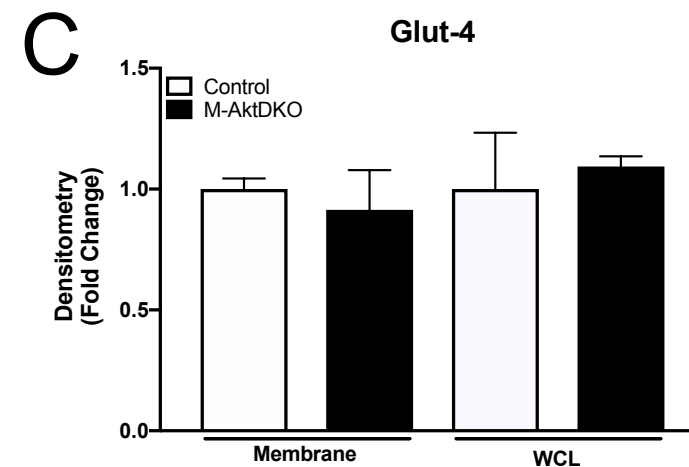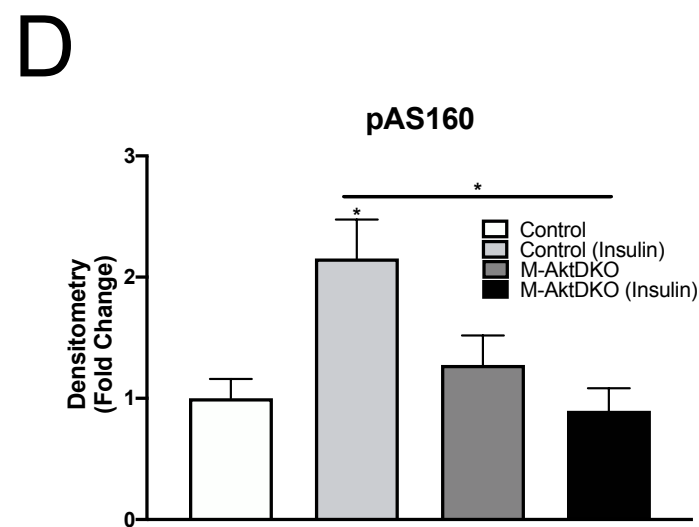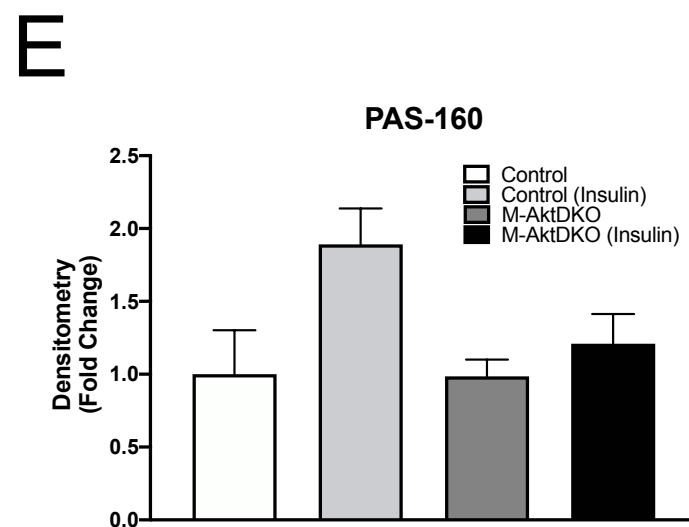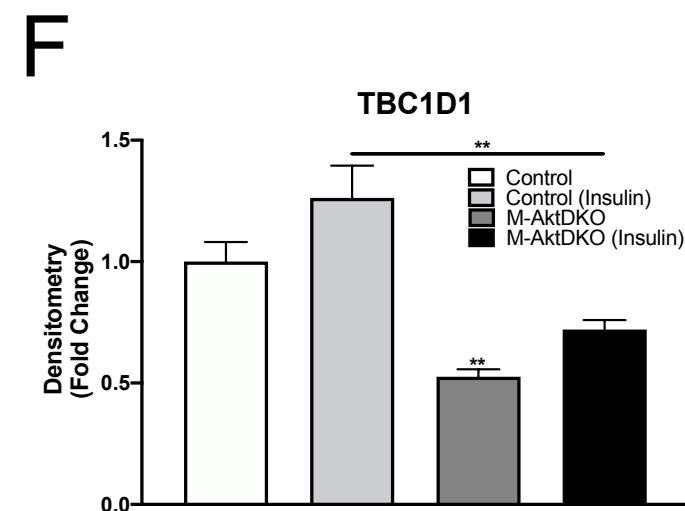

Supplementary figure 6: M-AktDKO mice display normal triglyceride and glycogen content

**A**

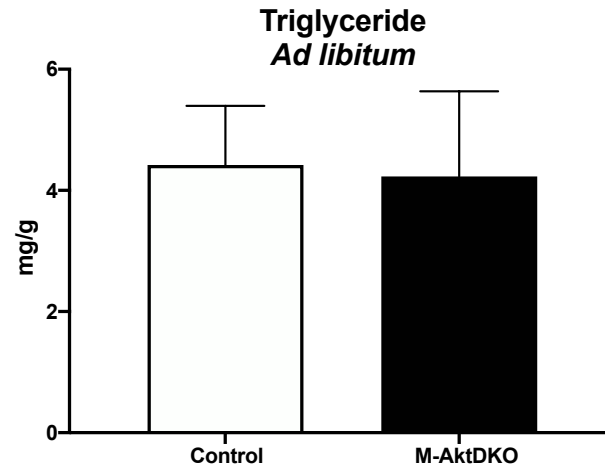

**B**

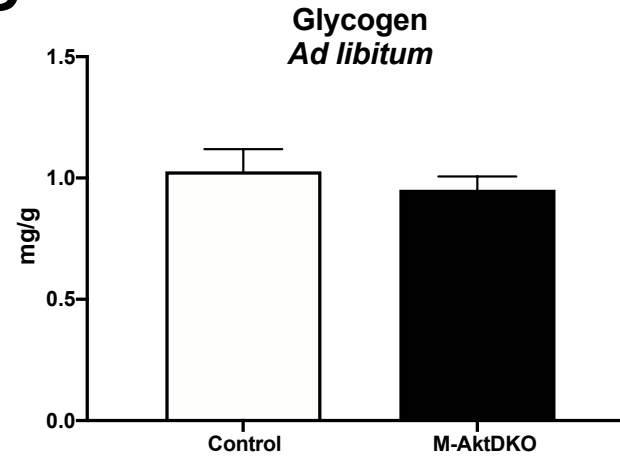

Supplementary Figure 7. Glut-4 protein expression in EDL and soleus muscle in M-indAktDKO mice and quantitation of western blots from Figure 6

**A**

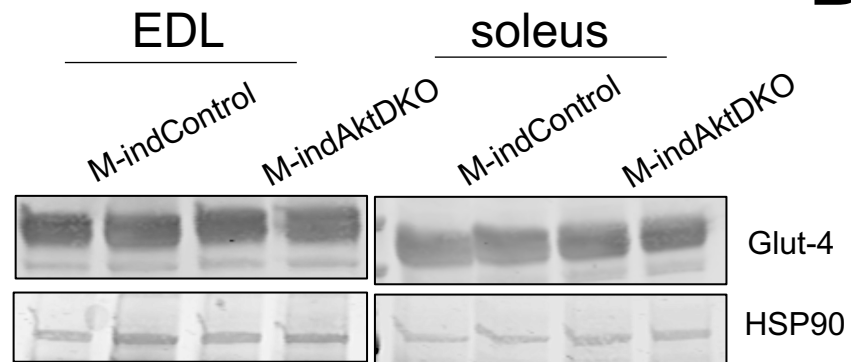

**B**

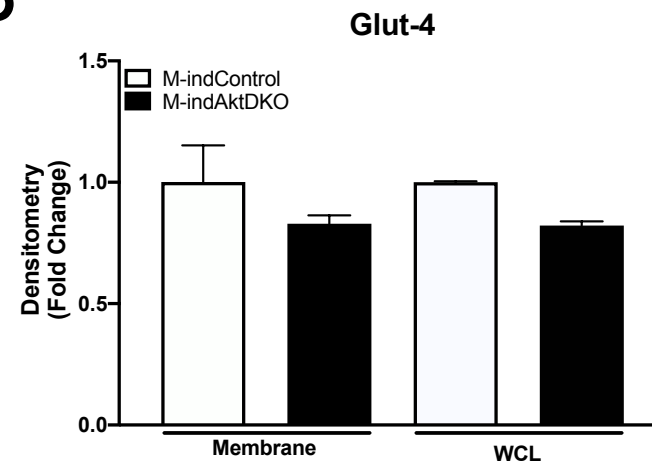

**C**

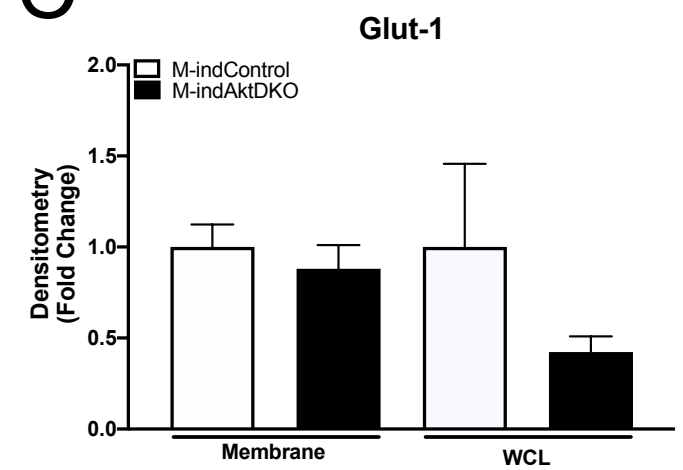

**D**

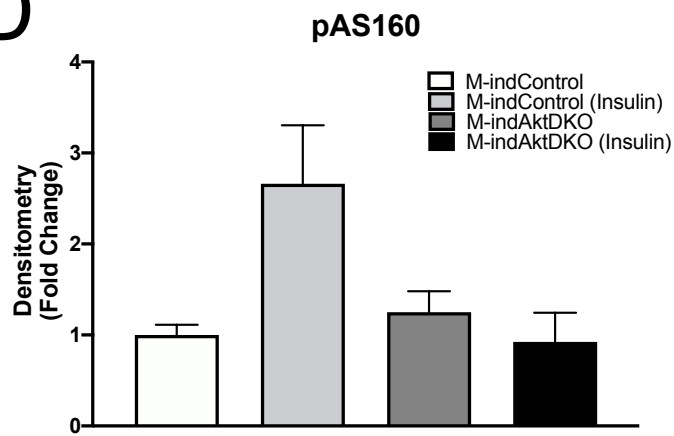

**E**

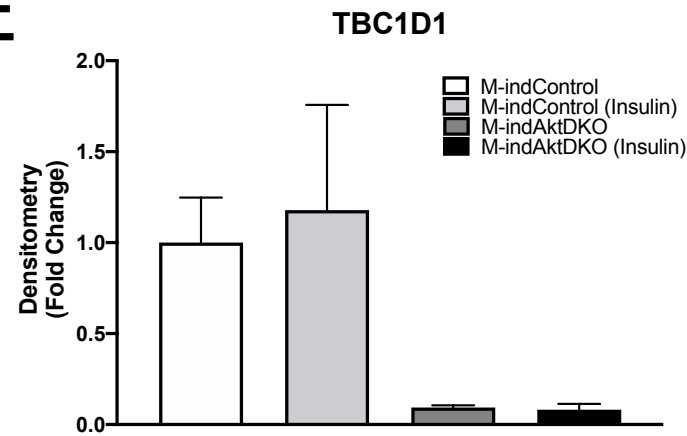

Supplementary Figure 8. Glycogen content in Quadriceps muscles of M-indAktDKO mice 4 weeks post-tamoxifen

**A**

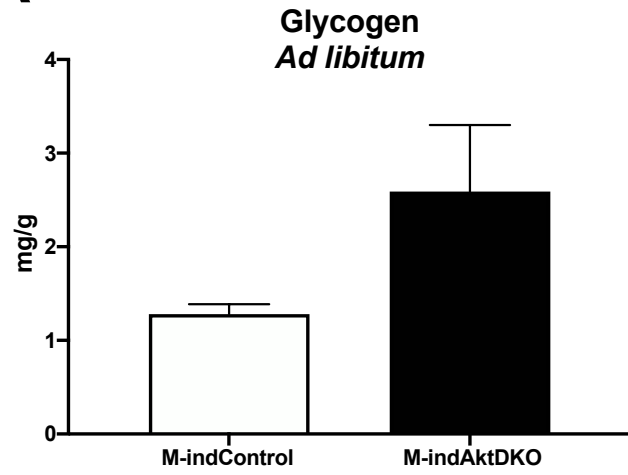



Supplementary Figure 9: Quantitation of western blots from Figure 7 and treatment with SBI-0206965, a small molecule AMPK inhibitor, in *ex vivo* muscle

**A**

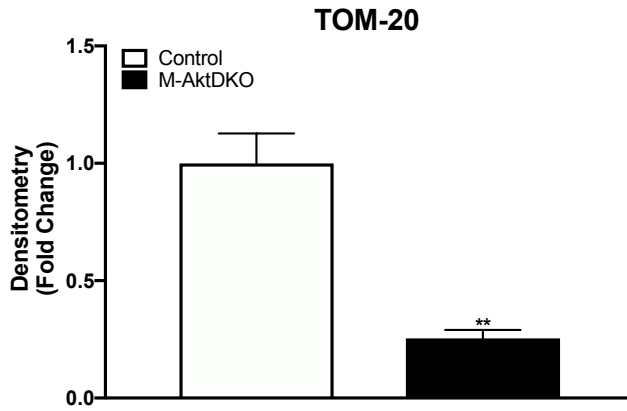

**B**

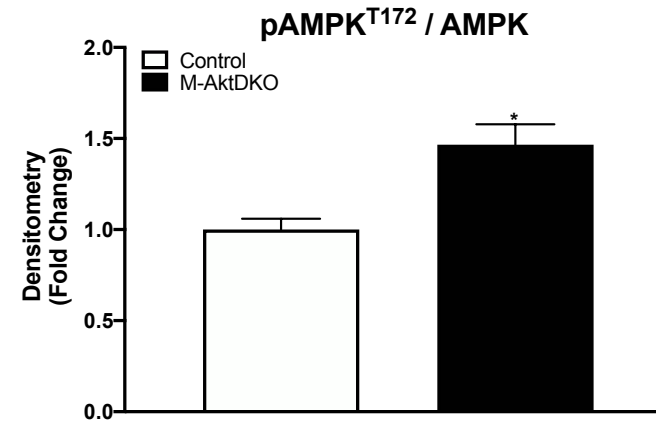

**C**

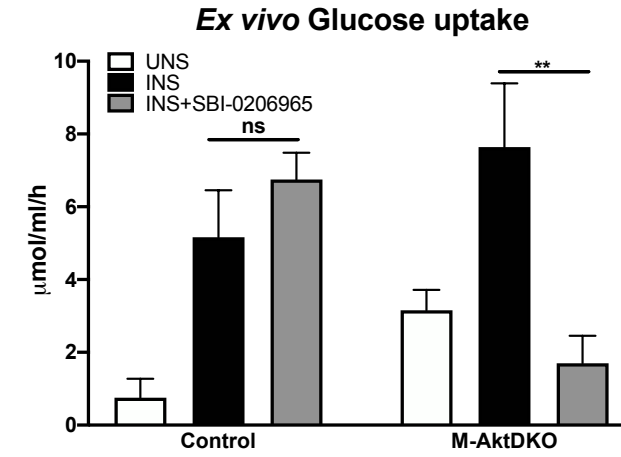

Supplement: mmc1.pdf [file mmc1.pdf]
